# Supplementary material
Source: Research Square preprint supplement (doi:10.21203/rs.3.rs-7716024/v1)
Supplement: Supplementary file 1 [file bd089d33dcbd33b280464bf9.pdf]

**Supplementary File 1: Adapted Questionnaire from Adeyemo & Musa  
(2025)  
(Part 1: Sections A–C)**

## **SECTION A: Sociodemographic Characteristics**

**1. Age:**

- 15–20     21–25     26–30     31–35     36–40     41+

**2. Gender:**

- Male     Female

**3. Level of Education:**

- Secondary     Tertiary     Postgraduate

**4. Occupation:**

- Student     Employed     Self-employed     Unemployed

## **SECTION B: Social Media Usage**

**5. Do you use social media?**

- Yes     No

**6. Which platforms do you use most? (Select all that apply)**

- WhatsApp  
 Facebook  
 Instagram  
 TikTok  
 Twitter/X  
 YouTube

**7. Frequency of social-media use:**

- Several times daily  
 Once daily  
 A few times weekly  
 Rarely

**8. Do you follow any dental pages online?**

- Yes     No

## **SECTION C: Influence of Digital Content**

**9. Have you ever seen posts about aesthetic dental procedures?**

- Yes     No

**10. What type of content attracts your attention? (Select all that apply)**

- Before–after pictures  
 Patient testimonials  
 Dentist educational posts  
 Paid adverts  
 Celebrity / influencer endorsements

**11. Platform that influenced you the most:**

- WhatsApp     Facebook     Instagram     TikTok     Twitter/X

**12. How convincing do you find before–after photos?**

- Very convincing     Moderately     Slightly     Not convincing

**13. Have you ever contacted a dentist after viewing online content?**

- Yes     No

## **SECTION D: Decision-Making Factors**

**14. What influenced your final choice of dental clinic?**

- Before–after images  
 Testimony from friends  
 Testimony from family  
 Social-media advert  
 Celebrity endorsement

**15. Do family or friends influence your decision to undergo aesthetic procedures?**

- Strongly  
 Somewhat  
 Slightly  
 Not at all

**16. Have you delayed treatment because of negative online comments?**

- Yes     No

**17. Have you encountered misleading dental information online?**

- Yes       No

**18. If yes, which type? (Select all that apply)**

- DIY whitening  
 Charcoal toothpaste  
 At-home braces  
 Fake dental professionals  
 Other: \_\_\_\_\_

## **SECTION E: Intention and Satisfaction**

**19. Would you consider an aesthetic dental procedure in the future based on what you saw online?**

- Yes       Maybe       No

**20. Did social media increase your confidence to approach a dentist?**

- Yes       No

**21. Satisfaction with dental service influenced by social media:**

- Very satisfied  
 Satisfied  
 Neutral  
 Unsatisfied

## **SECTION F: Optional Open-Ended Questions (Qualitative Insights)**

*(For participants willing to provide brief verbal or written responses.)*

**22. In your own words, who or what most influenced your decision to consider aesthetic dental treatment?**

---

---

**23. Have you ever discussed a dental post you saw on social media with family, friends, or church/community members?**

**If yes, what was discussed?**

---

---

**24. Have you ever come across misleading or confusing dental information online?**

**If yes, please describe the experience.**

---

---

**25. What would make social-media dental information more trustworthy for you?**

---
